# Supplementary material for: Rewiring of cortical glucose metabolism fuels human brain cancer growth
Source: bioRxiv or medRxiv preprint supplement (doi:10.1101/2023.10.24.23297489), 2023-10-25
Supplement: Supplementary file [file media-2.pdf]

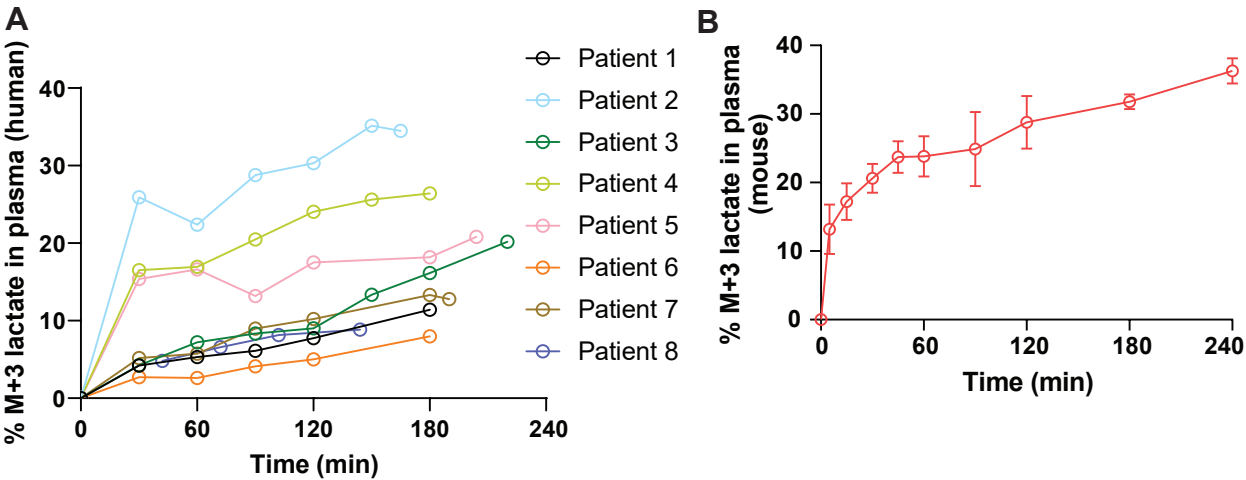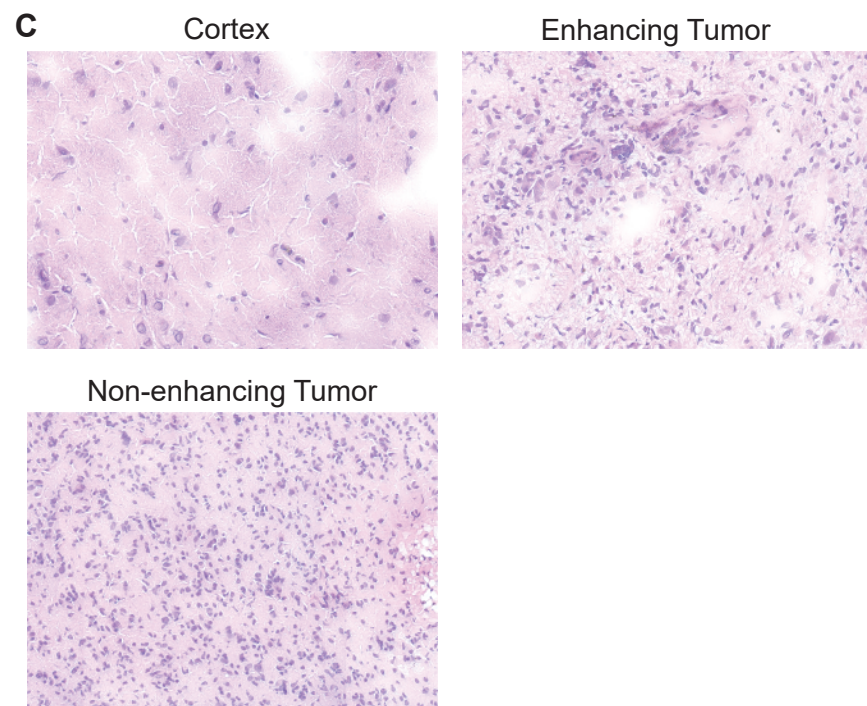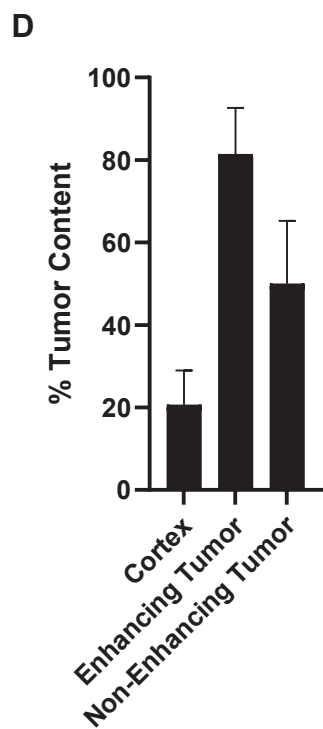

**Fig S1**

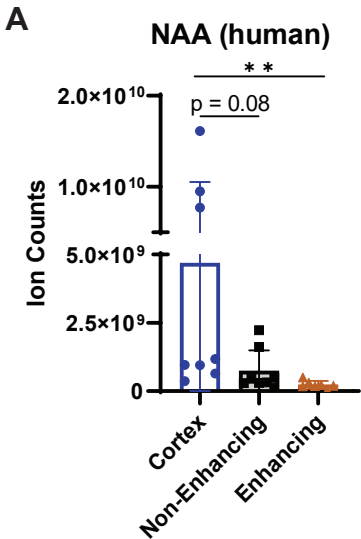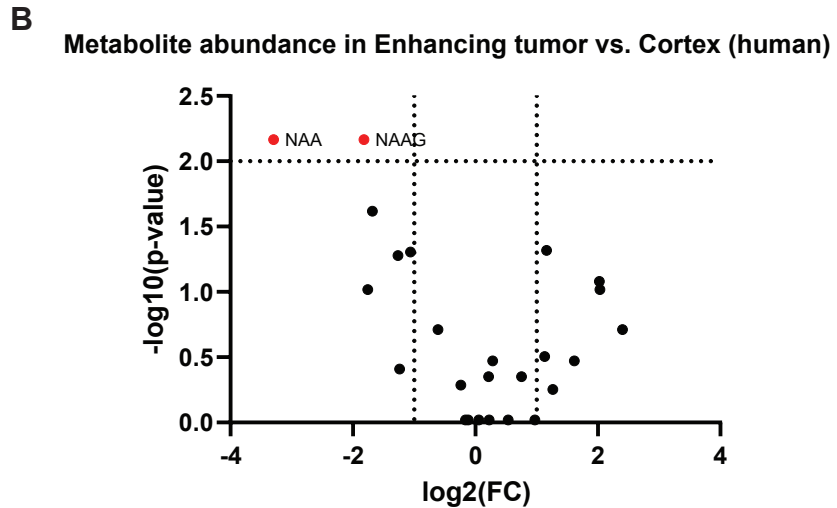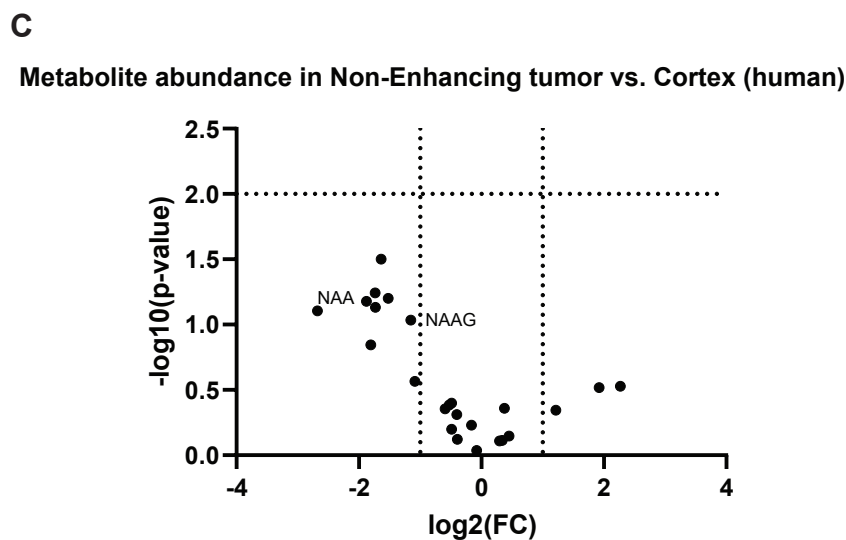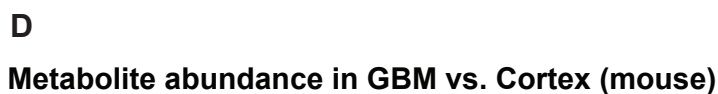

**Fig S2**

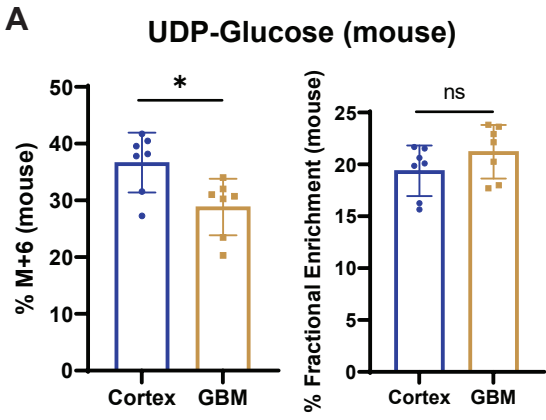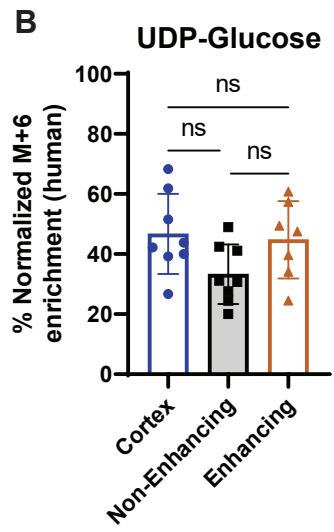

**Fig S3**

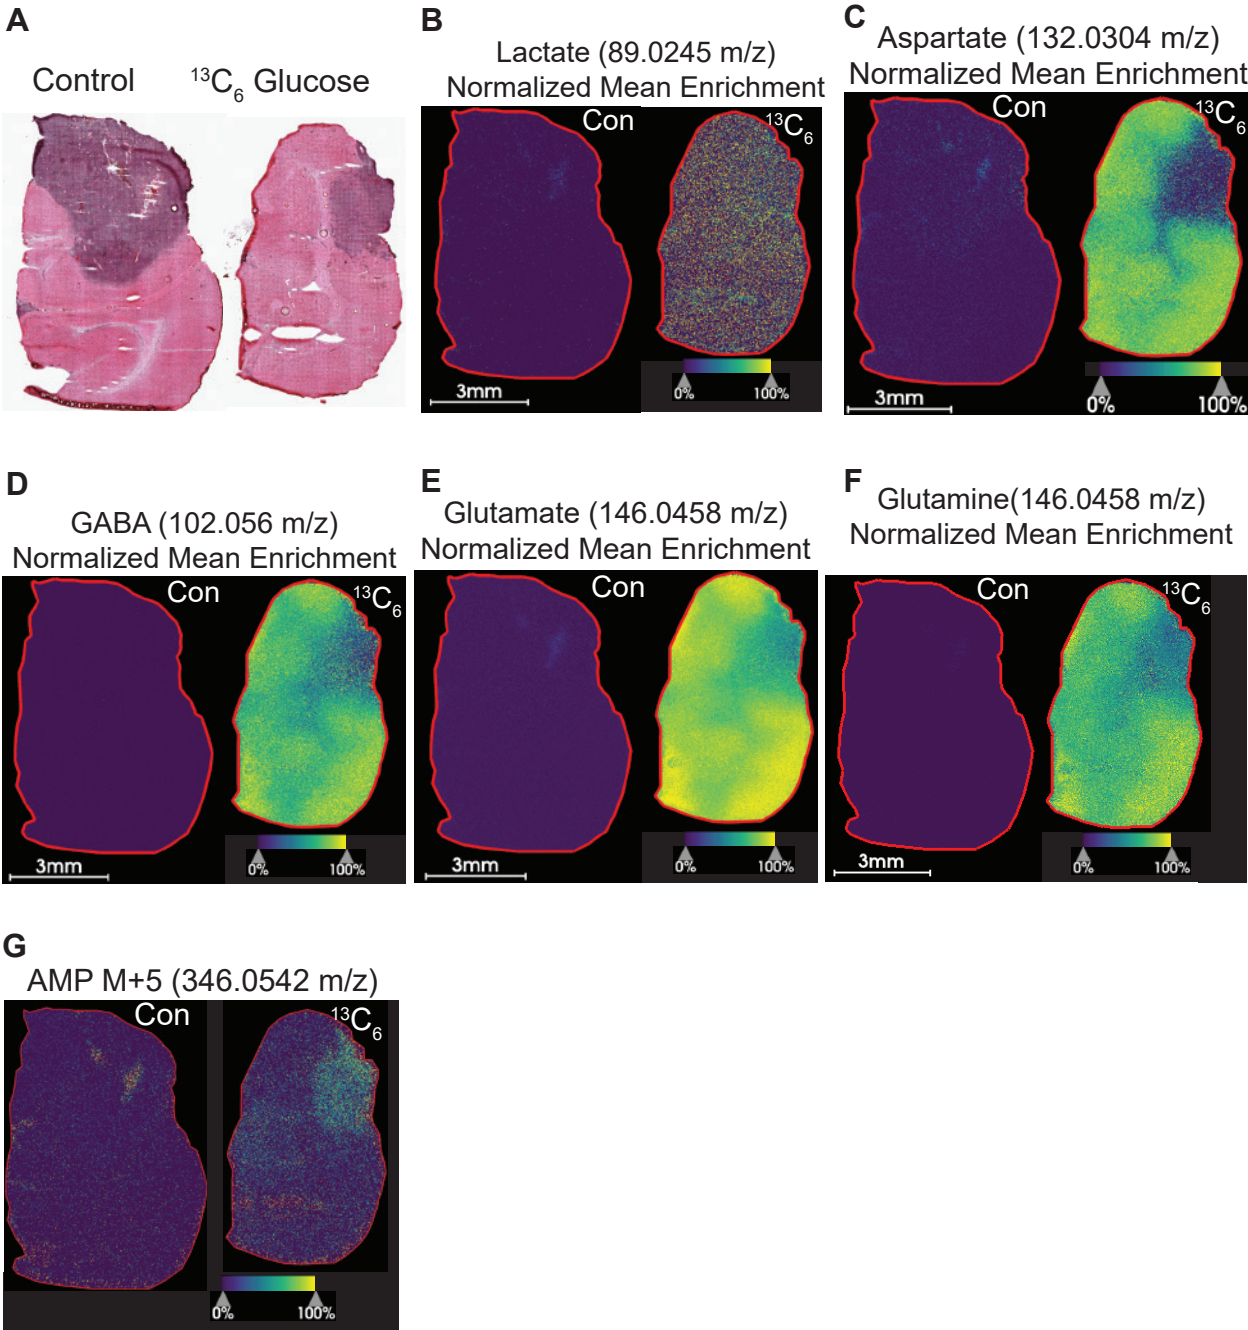

**Fig S4**

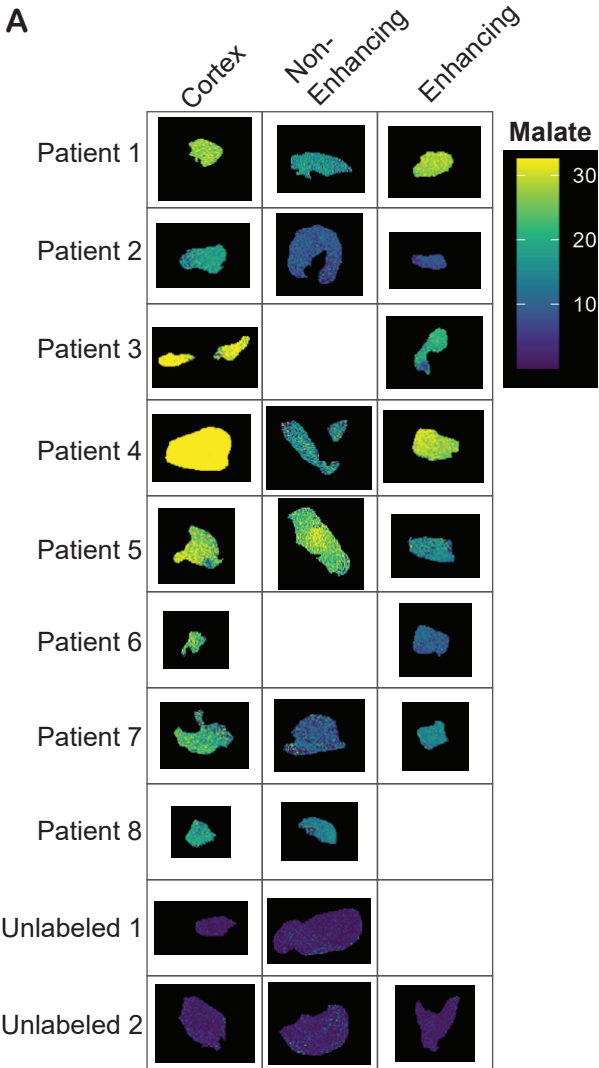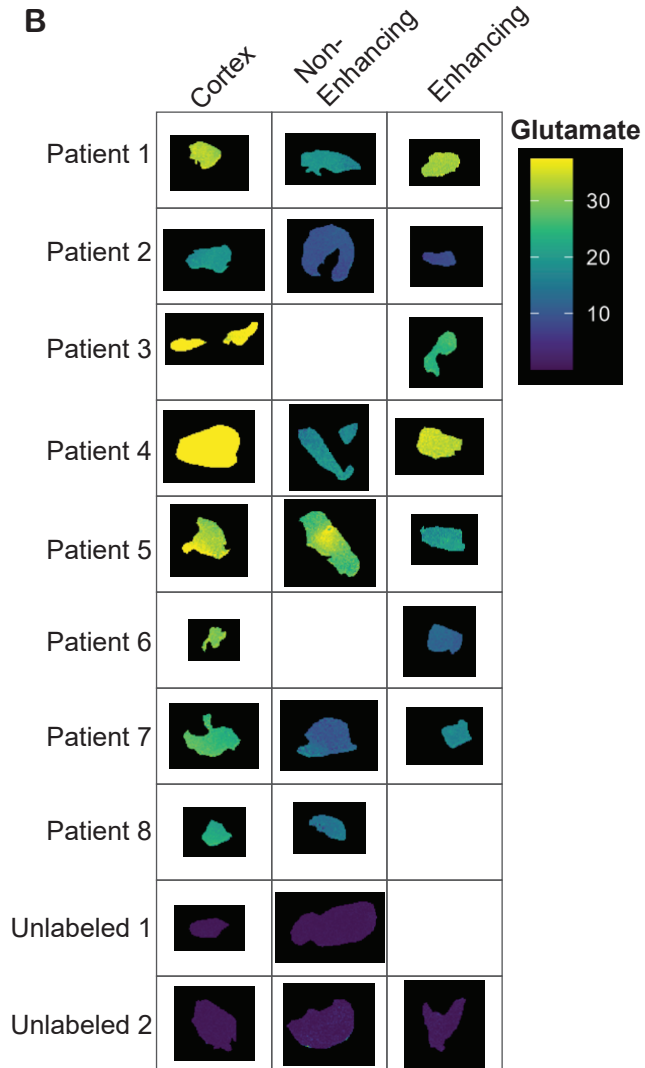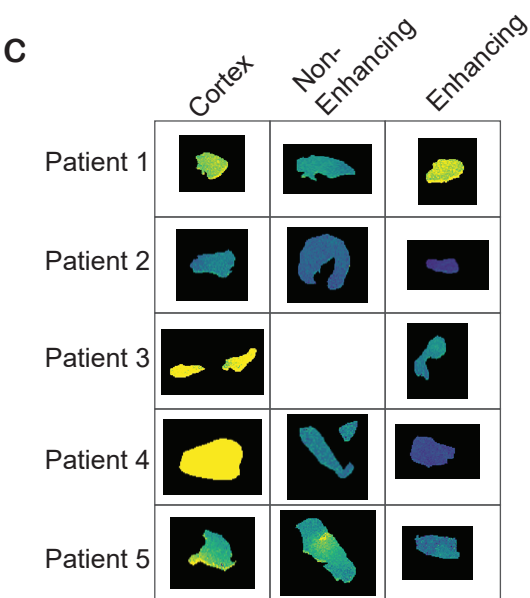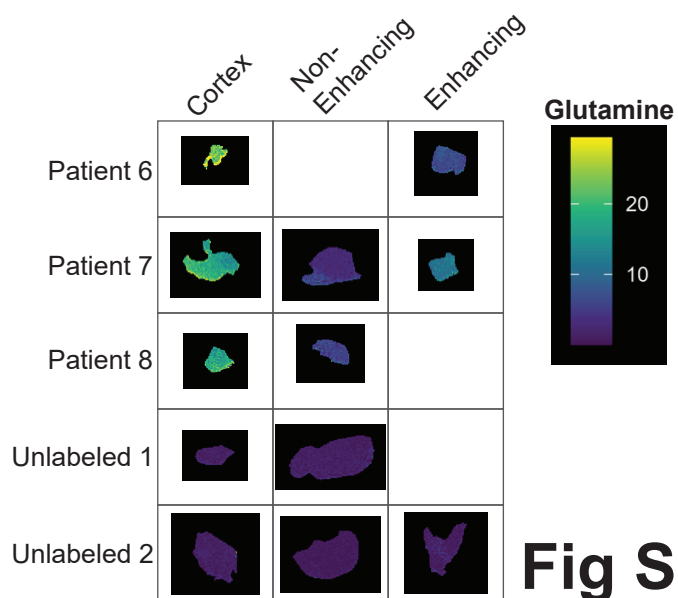

**Fig S5**

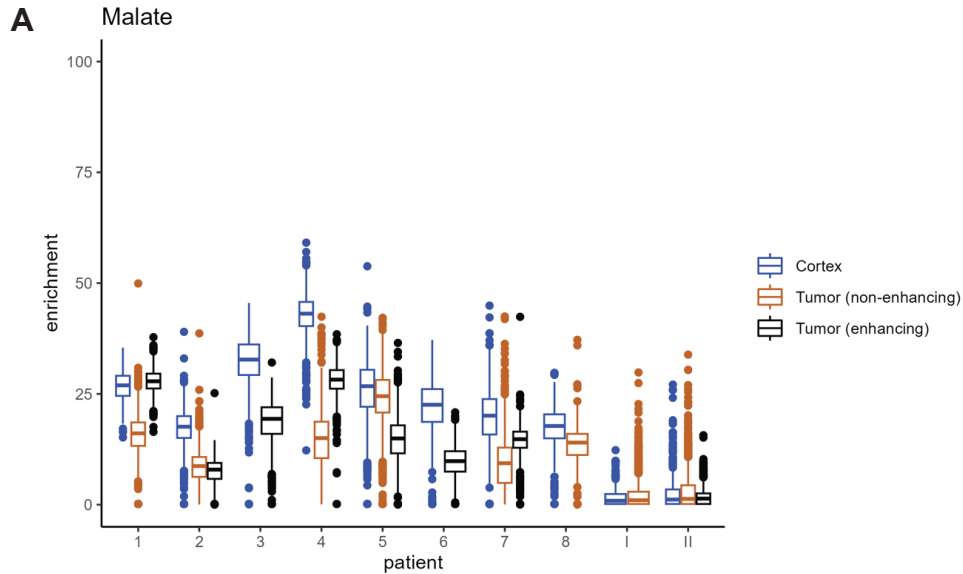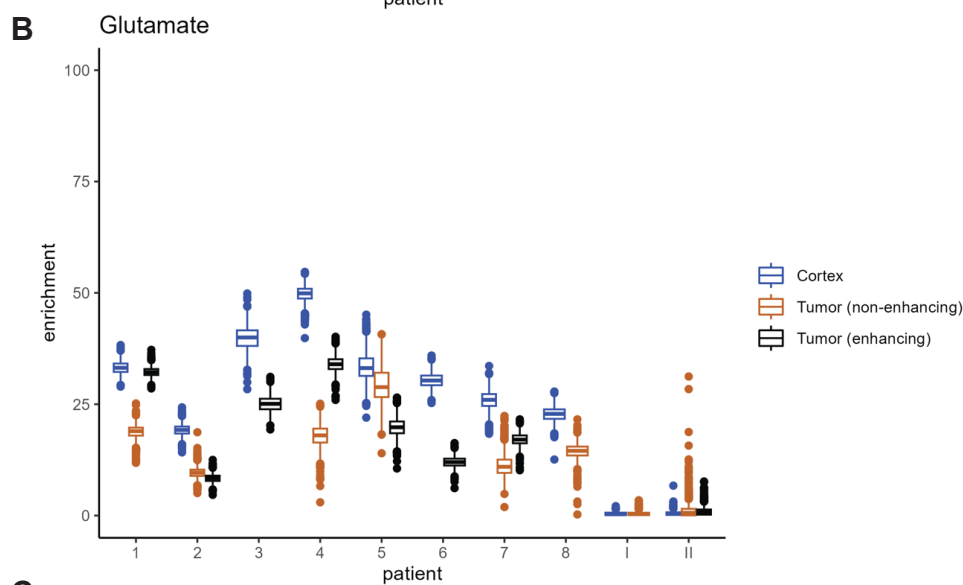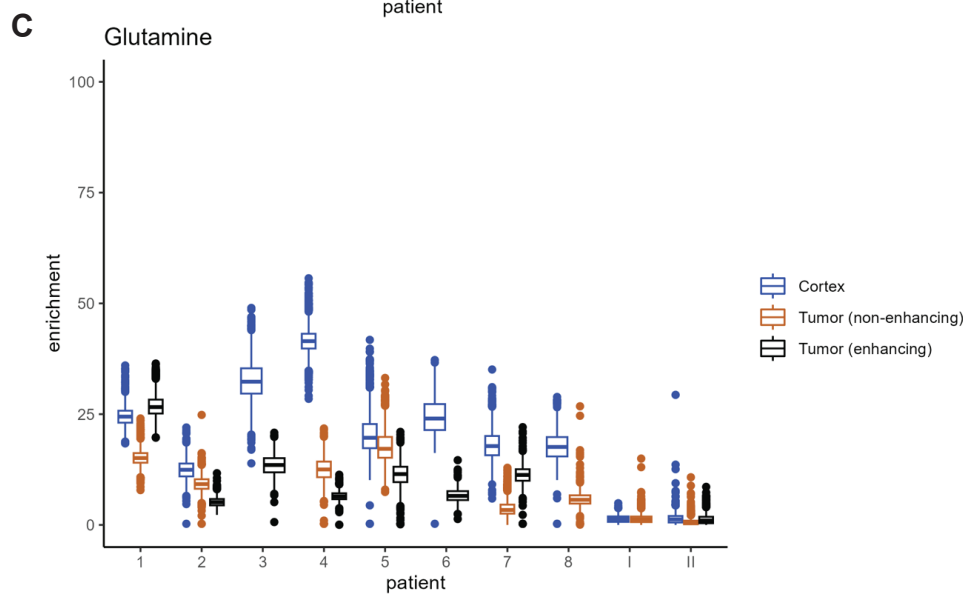

**Fig S6**

**A** Ribose-5-P (mouse)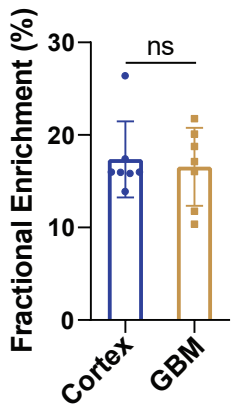**B** Ribose-5-P (human)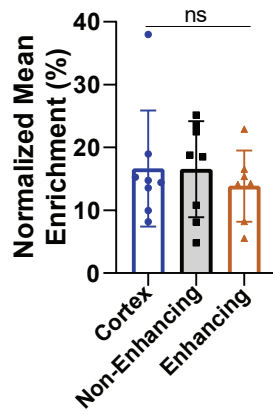

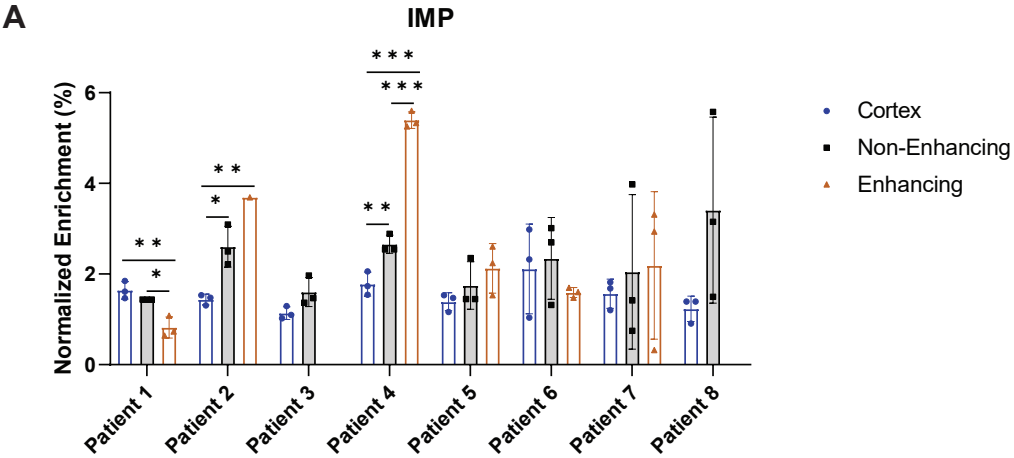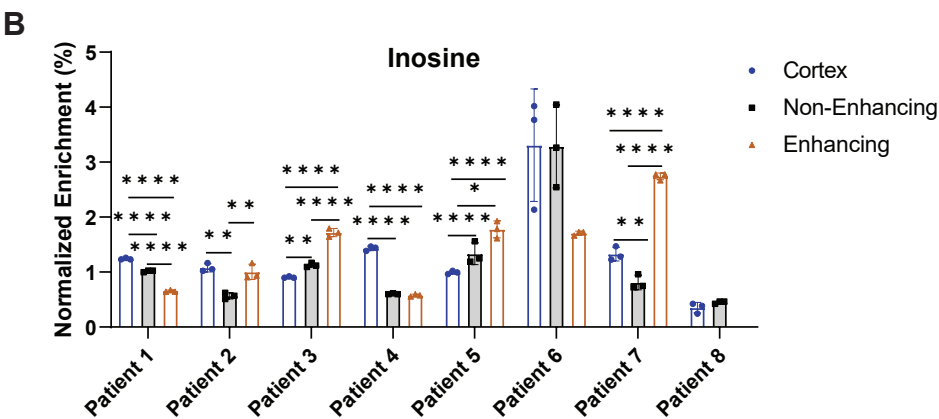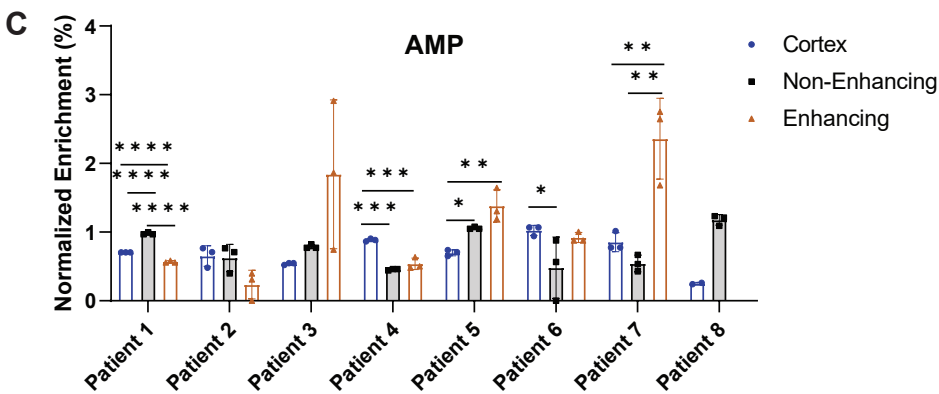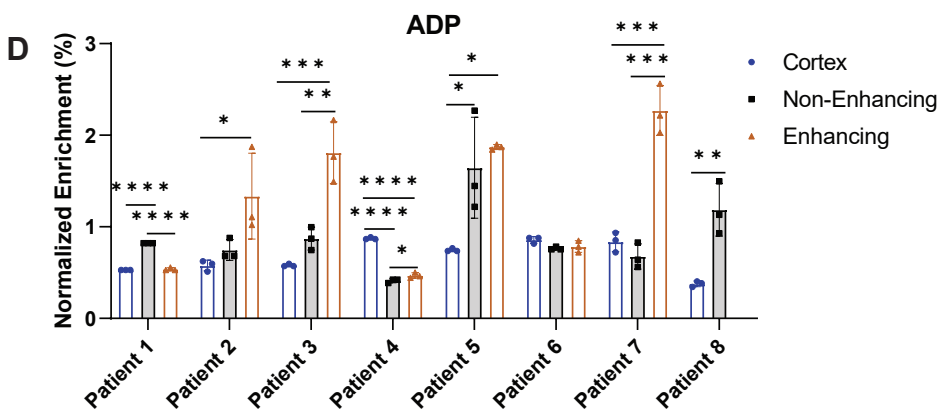

**Fig S8**



**A**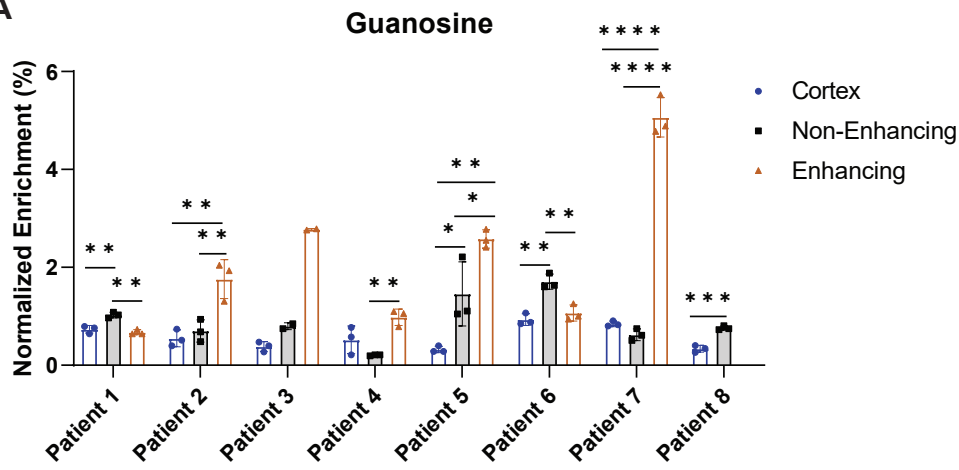**B**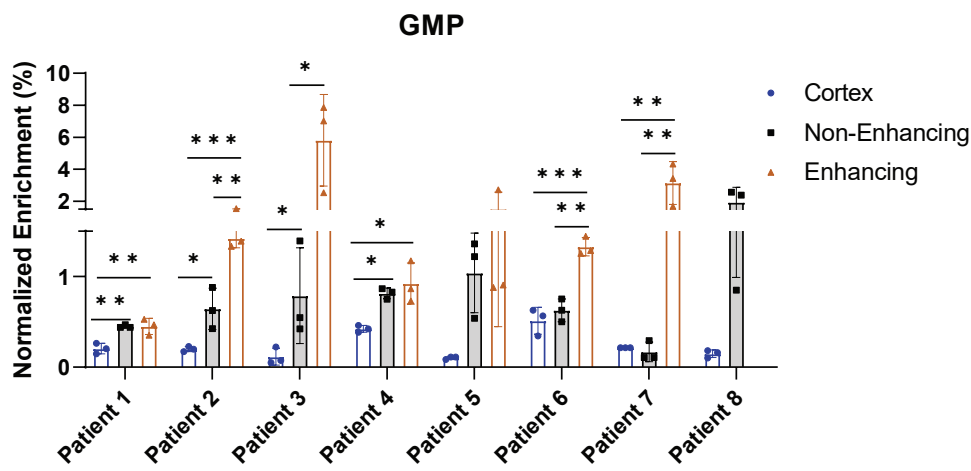**C**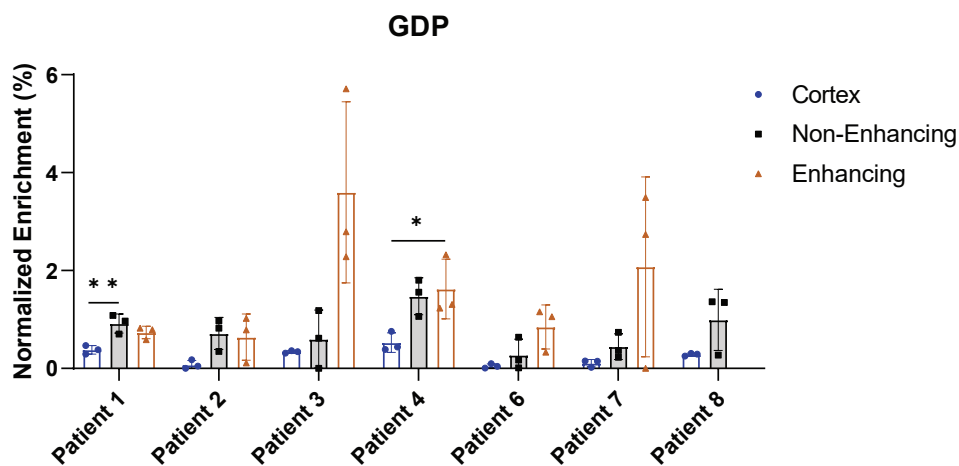

**A**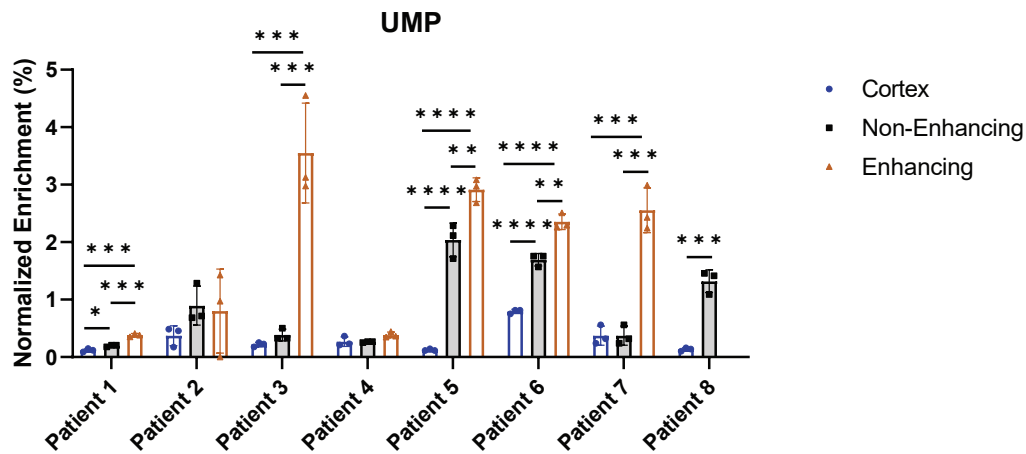**B**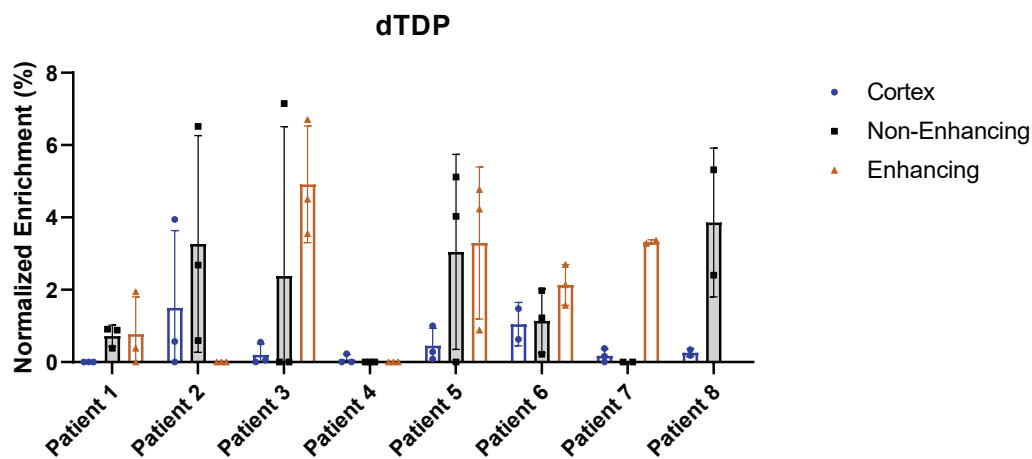

# Enrichment of NAD(H) from U-<sup>13</sup>C-glucose

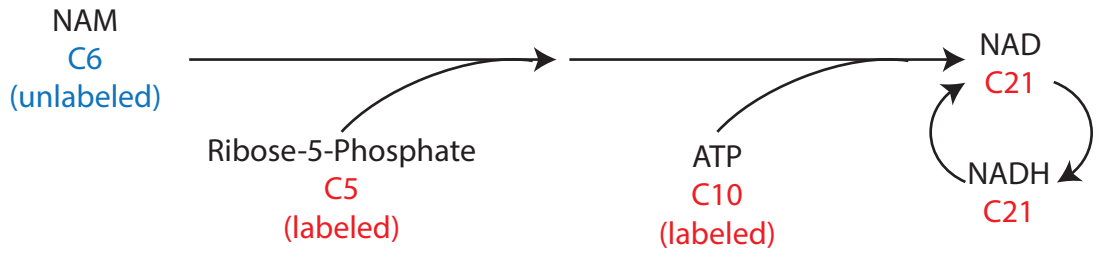

B

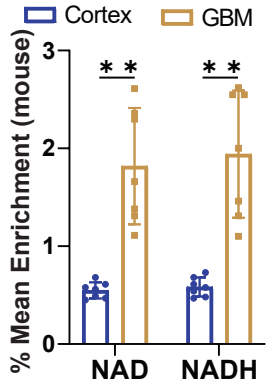

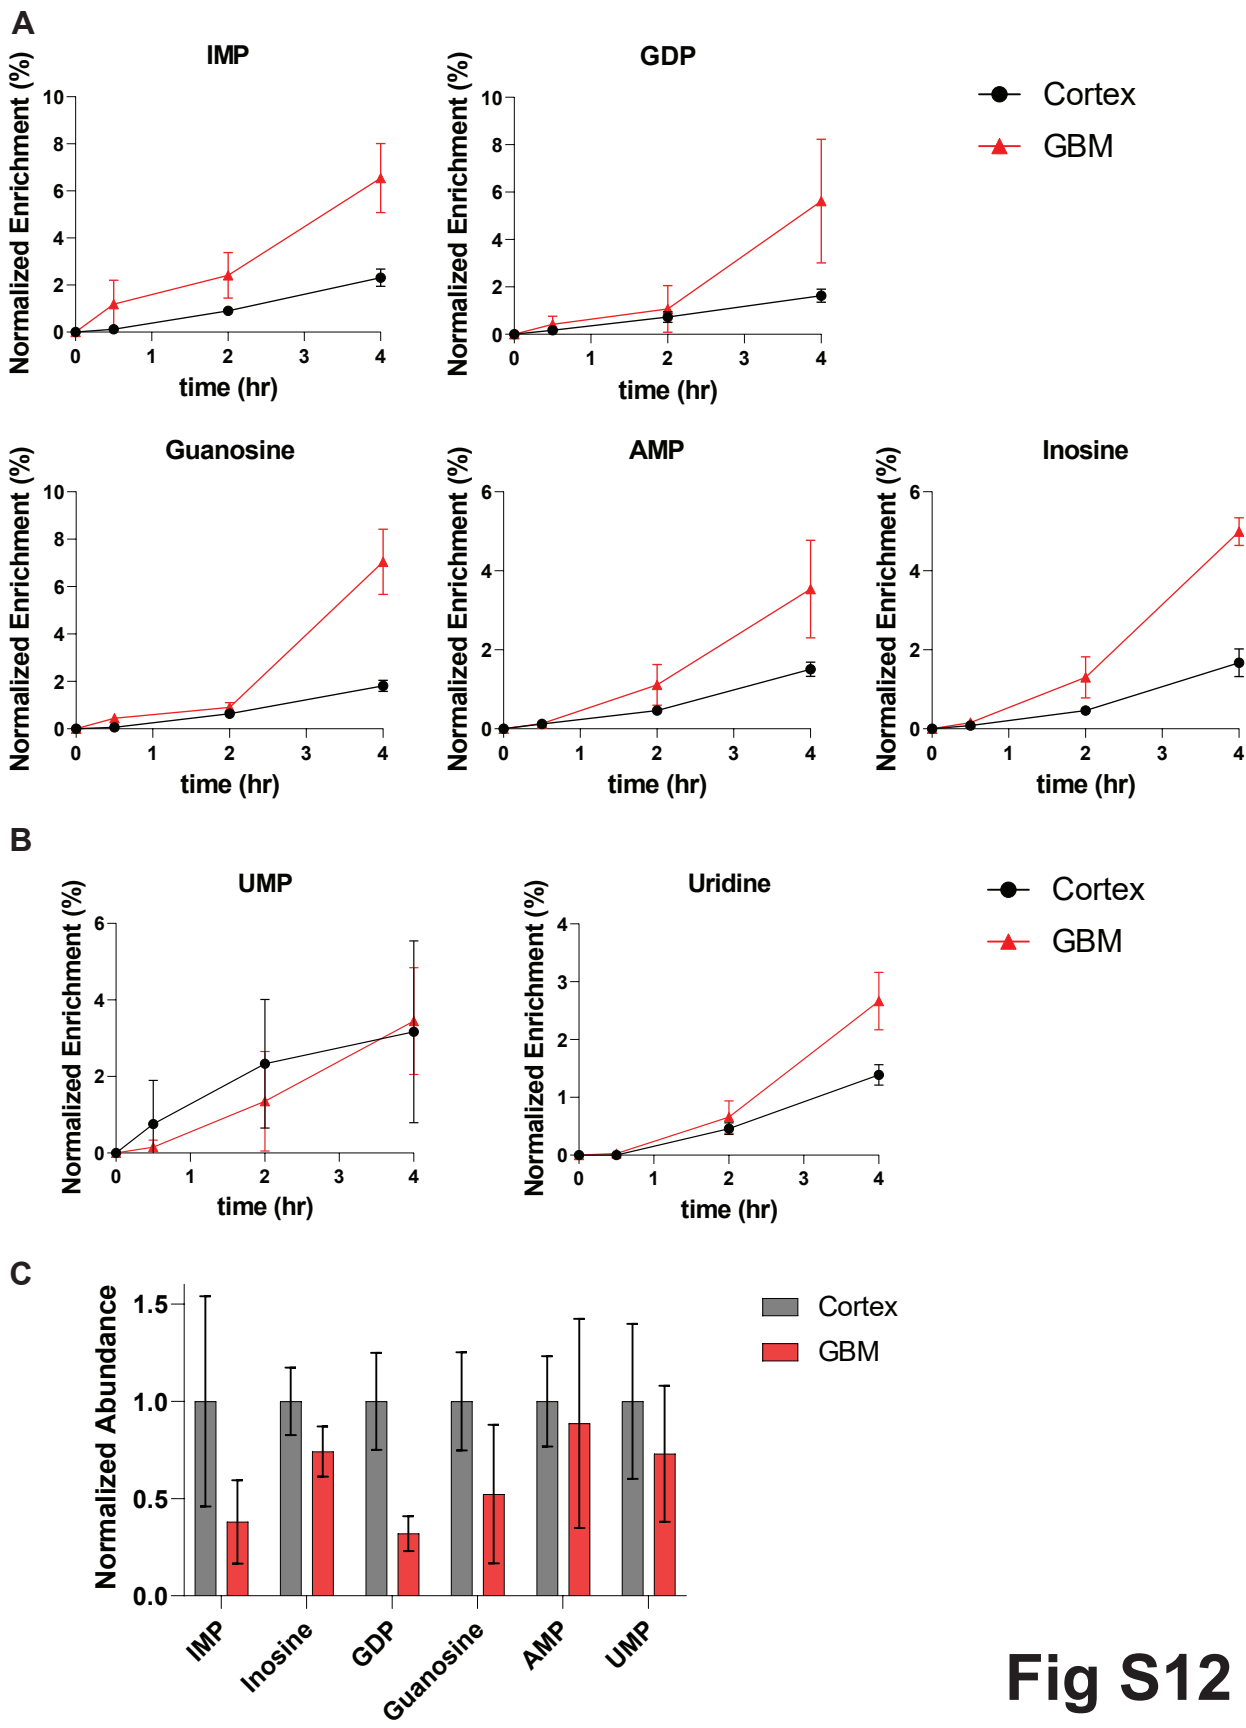

**A**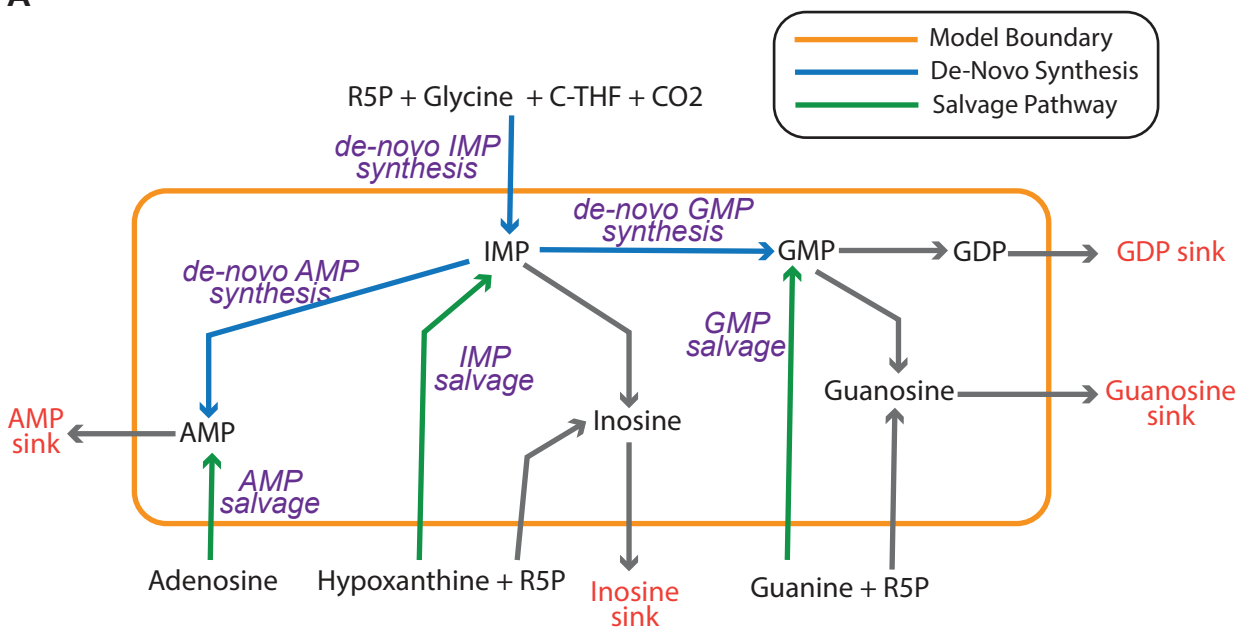**B**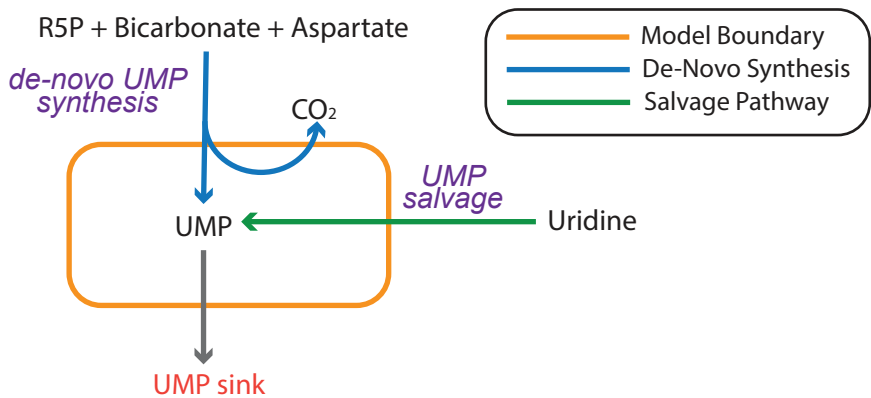**Fig S13**

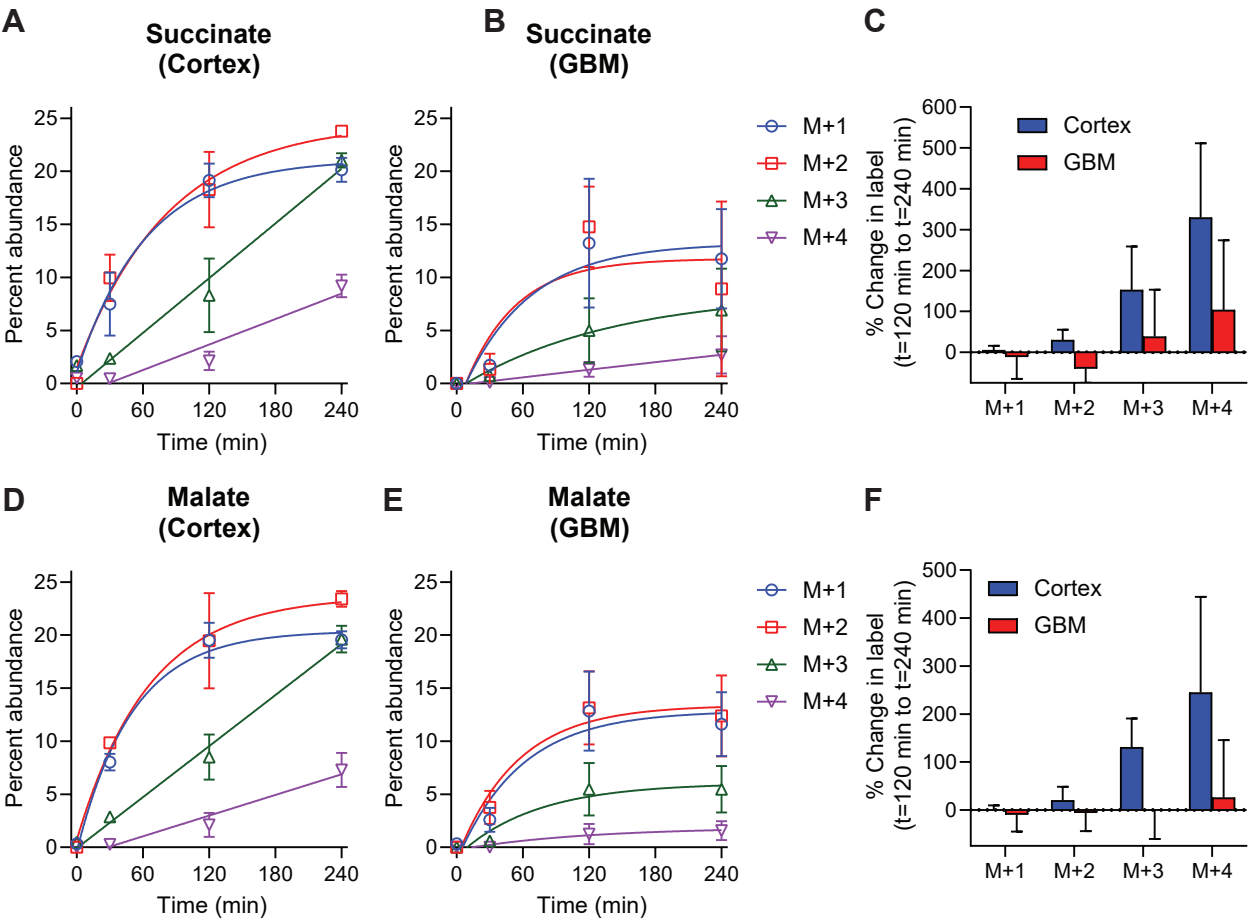

**Fig S14**

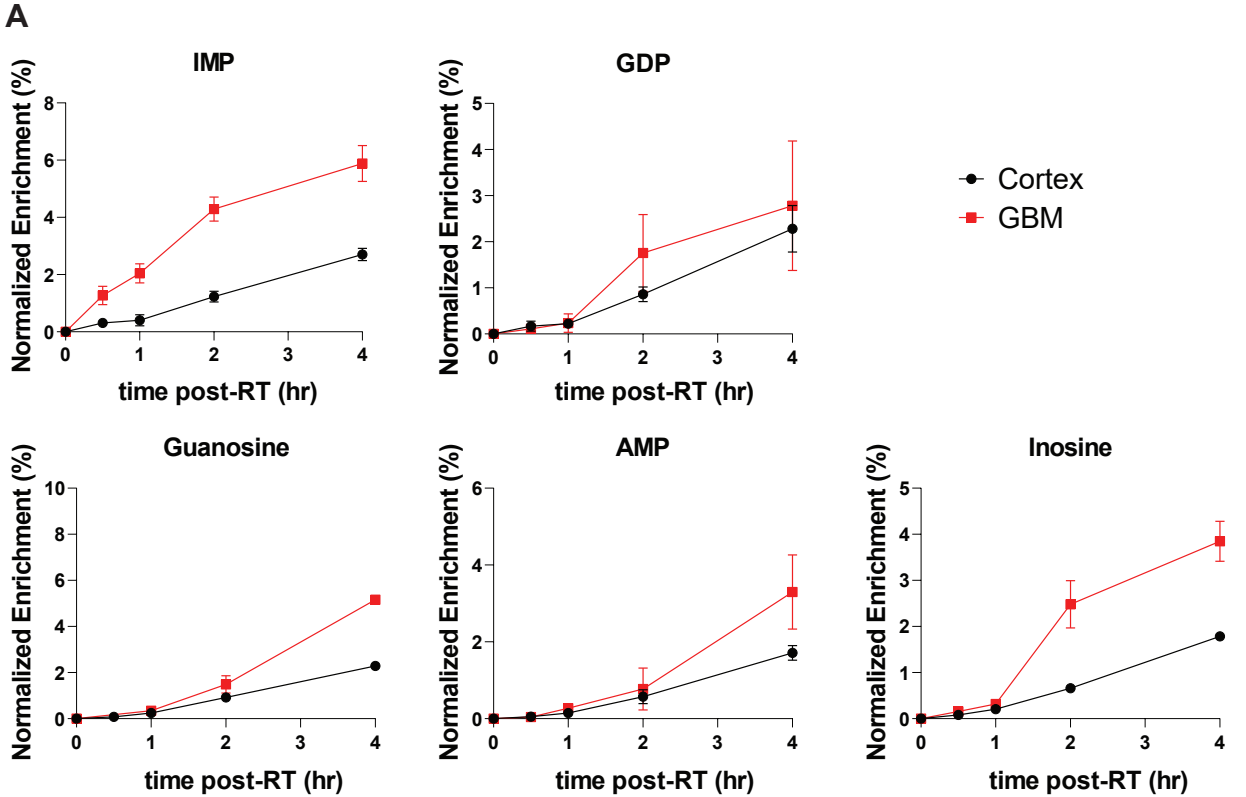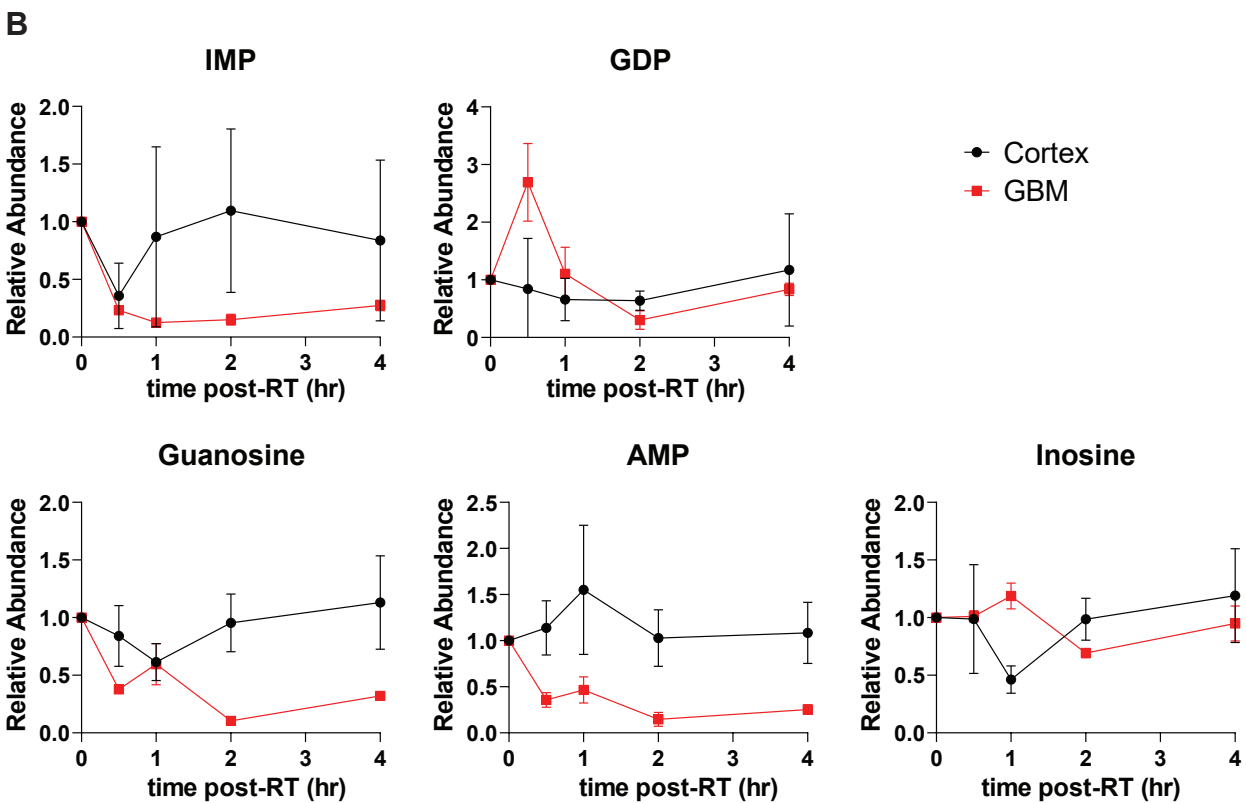

**Fig S15**

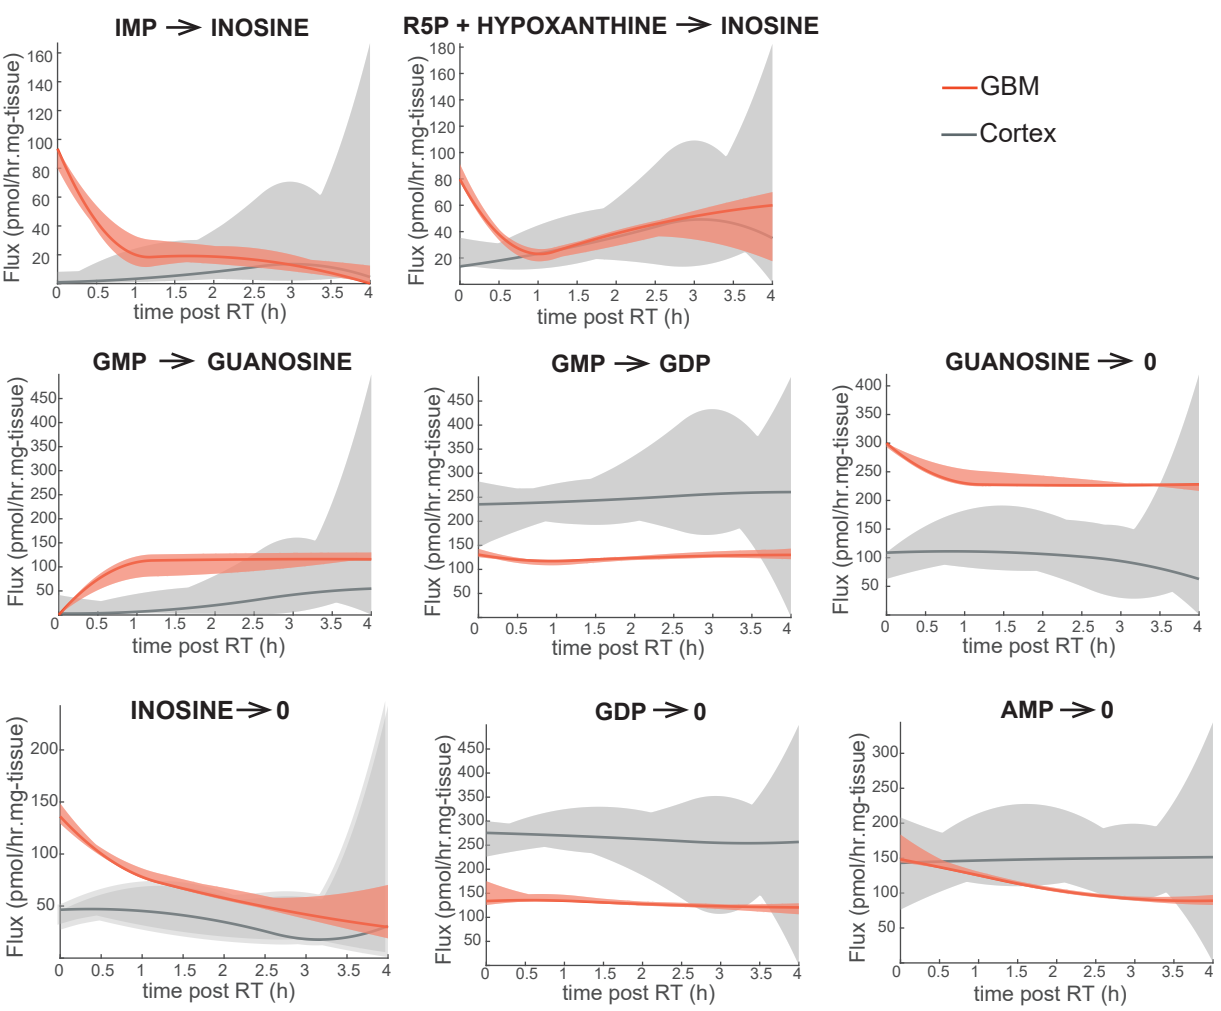

**Fig S16**



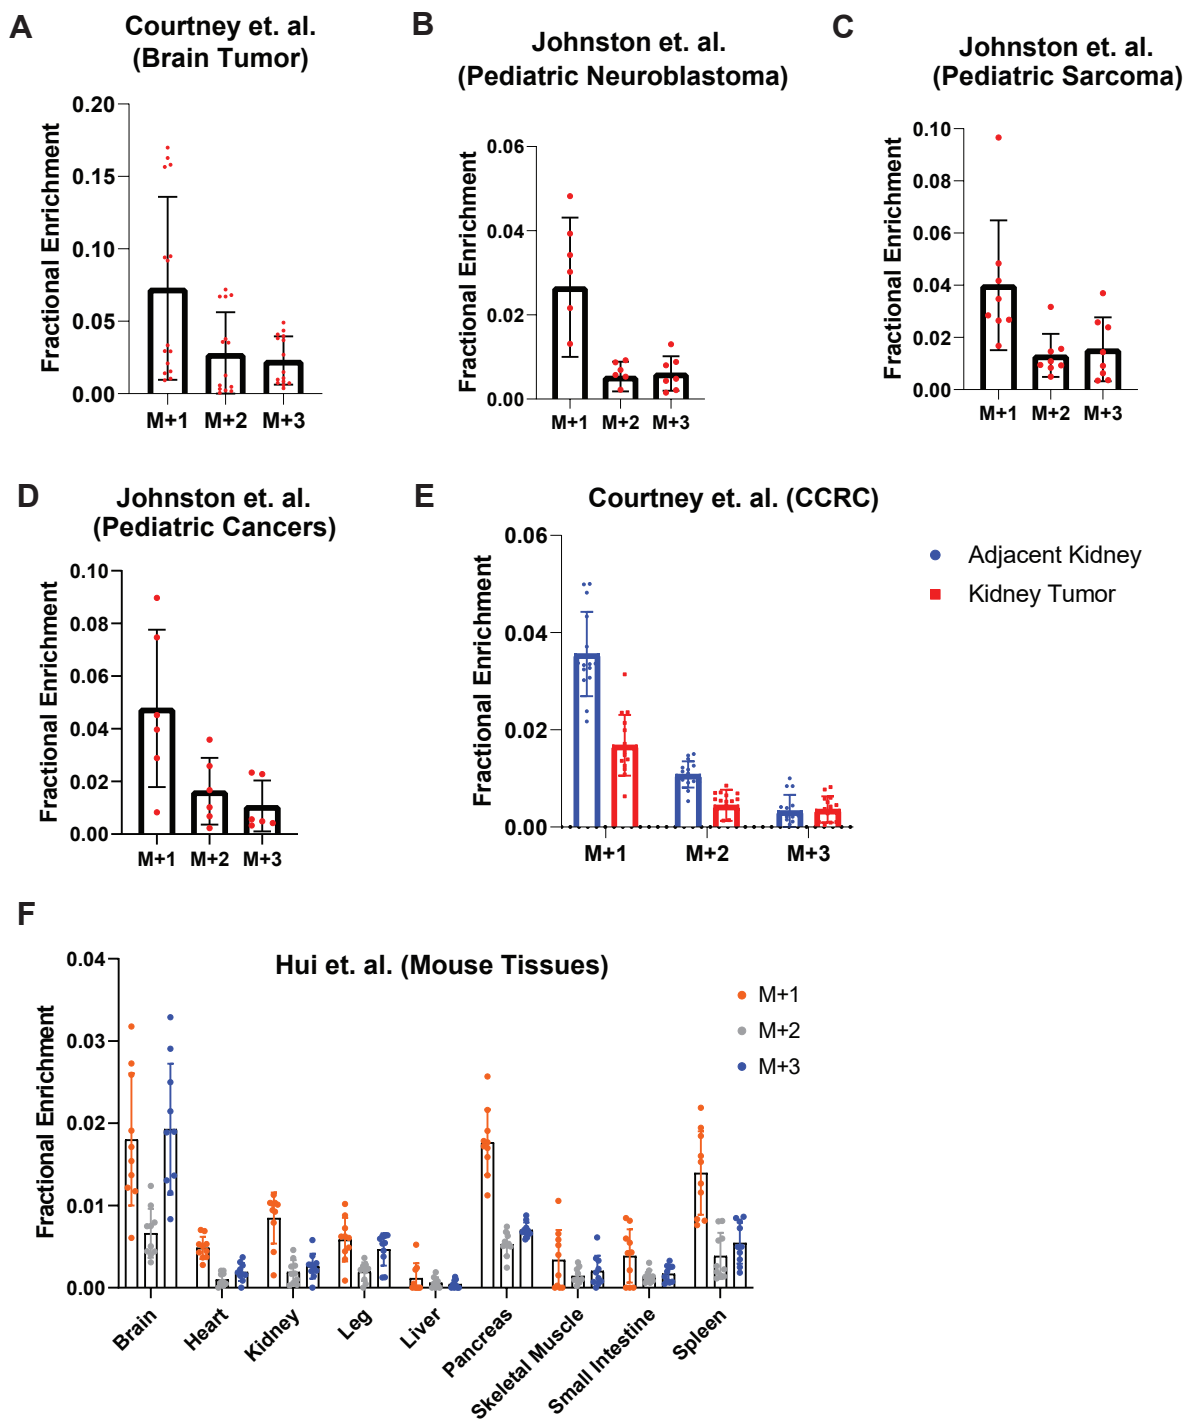

**Fig S17**

**A**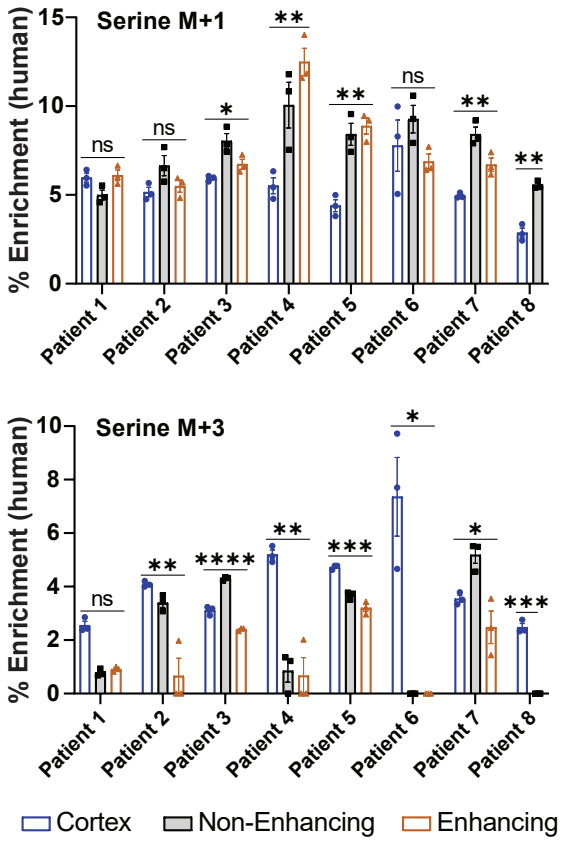**B**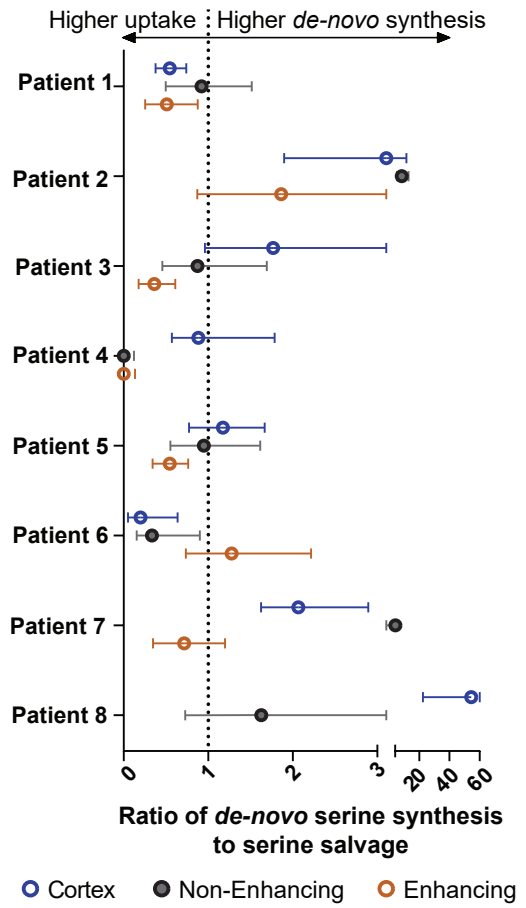**Fig S18**

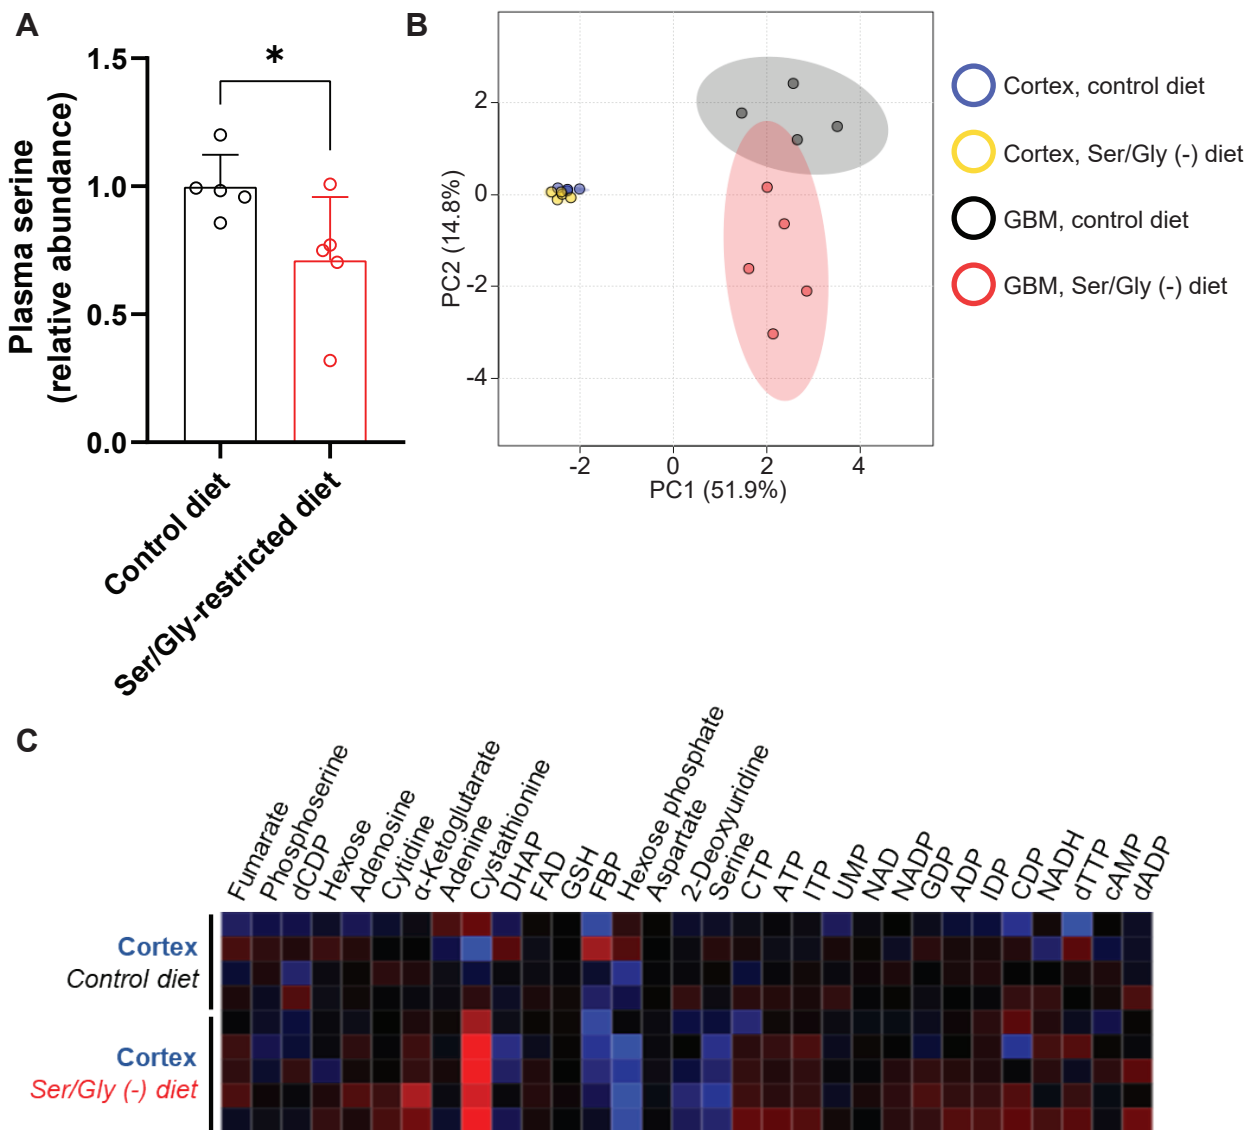

**Fig S19**
